# Supplementary material for: Mobile App Rating Scale: A New Tool for Assessing the Quality of Health Mobile Apps
Source: PubMed Central journal article supplement (PMC4376132; doi:10.2196/mhealth.3422), 2015-03-11
Supplement: mhealth_v3i1e27_app3.pdf [file mhealth_v3i1e27_app3.pdf]

# Mobile Apps Used for MARS Evaluation

## 9 Apps used for MARS piloting

| Name                           | Engage-<br>ment | Func-<br>tionality | Aes-<br>thetics | Infor-<br>mation | Sub-<br>jective | Total<br>Mean |
|--------------------------------|-----------------|--------------------|-----------------|------------------|-----------------|---------------|
| Breathe Daily                  | 2.90            | 4.25               | 3.00            | 3.92             | 2.38            | 3.52          |
| Meditation Seconds Lite        | 3.80            | 3.88               | 4.50            | 4.04             | 3.00            | 4.05          |
| Interpersonal Dynamics         | 2.70            | 4.75               | 3.50            | 4.65             | 2.50            | 3.90          |
| We Breathe                     | 4.30            | 4.25               | 3.17            | 3.75             | 2.38            | 3.87          |
| Everyday Heal with Acupressure | 3.70            | 3.75               | 3.83            | 4.08             | 2.50            | 3.84          |
| Personal Remedies              | 2.90            | 3.50               | 3.17            | 3.75             | 2.63            | 3.33          |
| Sleep Easily                   | 2.30            | 4.75               | 2.33            | 3.58             | 1.88            | 3.24          |
| iThoughtjournal                | 2.70            | 4.38               | 2.83            | 3.00             | 2.00            | 3.23          |
| iPhoria Nature's Music         | 2.60            | 4.13               | 3.83            | 2.08             | 2.63            | 3.16          |

## 50 apps used for MARS reliability test

| Name                               | Engage-<br>ment | Func-<br>tionality | Aes-<br>thetics | Infor-<br>mation | Sub-<br>jective | Total<br>Mean |
|------------------------------------|-----------------|--------------------|-----------------|------------------|-----------------|---------------|
| Headspace                          | 4.30            | 4.50               | 4.83            | 4.33             | 4.25            | 4.49          |
| Momentum Challenge                 | 4.60            | 4.75               | 3.83            | 4.60             | 3.25            | 4.45          |
| NIVEA pure and natural             | 3.90            | 4.75               | 4.67            | 4.30             | 3.00            | 4.4           |
| In Flow- Mood and Emotion          | 4.20            | 4.75               | 4.83            | 3.46             | 3.50            | 4.31          |
| Smiling Mind                       | 3.90            | 4.50               | 4.5             | 4.32             | 3.75            | 4.30          |
| Brainy App                         | 4.40            | 4.50               | 3.83            | 4.42             | 4.13            | 4.29          |
| PTSD Coach                         | 3.60            | 4.63               | 4.33            | 4.58             | 3.88            | 4.29          |
| Healing Time                       | 3.30            | 4.63               | 4.17            | 3.83             | 2.38            | 3.98          |
| Moodlytics- The Smart Mood Tracker | 3.90            | 4.25               | 4.00            | 3.75             | 3.00            | 3.97          |
| Bloom                              | 3.90            | 4.38               | 4.33            | 3.23             | 2.75            | 3.96          |
| Humana fit                         | 4.20            | 3.50               | 4.17            | 3.75             | 3.00            | 3.90          |
| Kissy Project                      | 2.80            | 4.75               | 3.67            | 4.20             | 3.13            | 3.85          |
| Hot Body Yoga                      | 3.00            | 4.25               | 3.83            | 4.00             | 2.50            | 3.77          |
| Total Awake                        | 3.90            | 3.00               | 4.00            | 3.58             | 2.00            | 3.62          |
| Nursing Psychiatric Drugs          | 2.10            | 4.38               | 3.50            | 4.38             | 4.00            | 3.59          |
| Free Your Mind Hypnosis            | 2.90            | 4.38               | 4.33            | 2.70             | 2.00            | 3.58          |
| Tactical Breather                  | 2.20            | 4.50               | 3.50            | 3.97             | 1.88            | 3.54          |
| Thirsty Fish                       | 2.60            | 4.38               | 4.17            | 2.63             | 1.63            | 3.44          |
| Deep Relaxation Silvia             | 2.00            | 4.38               | 3.17            | 4.20             | 2.25            | 3.44          |
| Mindful Moments                    | 2.90            | 4.00               | 3.00            | 3.80             | 1.50            | 3.43          |
| Stop Stress Pro                    | 3.10            | 3.88               | 3.17            | 3.40             | 2.38            | 3.39          |
| Self Help                          | 2.70            | 3.38               | 3.33            | 4.08             | 3.13            | 3.37          |
| Conscious                          | 3.00            | 3.50               | 3.33            | 3.60             | 2.25            | 3.36          |
| Relax with Andrew Johnson          | 2.20            | 4.63               | 3.33            | 3.10             | 2.00            | 3.31          |

|                                                               |      |      |      |      |      |      |
|---------------------------------------------------------------|------|------|------|------|------|------|
| <b>Get relaxed free- Personal Hypnosis Program</b>            | 1.60 | 4.63 | 3.67 | 3.30 | 1.75 | 3.30 |
| <b>MyPsych</b>                                                | 3.30 | 3.38 | 3.17 | 3.17 | 1.63 | 3.25 |
| <b>ASK and Prevent Suicide</b>                                | 1.50 | 4.50 | 3.00 | 3.80 | 2.38 | 3.20 |
| <b>EFT Clinic</b>                                             | 1.60 | 4.13 | 3.50 | 3.58 | 1.50 | 3.20 |
| <b>Mindfulness TS</b>                                         | 2.30 | 3.38 | 3.33 | 3.70 | 1.75 | 3.18 |
| <b>Sleep App Insomnia</b>                                     | 2.30 | 3.75 | 4.50 | 2.00 | 1.63 | 3.14 |
| <b>Alpha Mind System</b>                                      | 2.40 | 3.75 | 2.83 | 3.55 | 1.63 | 3.13 |
| <b>Depression Monitor</b>                                     | 2.40 | 3.63 | 3.17 | 3.25 | 2.00 | 3.11 |
| <b>Gratitude Tree</b>                                         | 2.70 | 4.00 | 2.67 | 3.00 | 2.13 | 3.09 |
| <b>Positive Me</b>                                            | 1.80 | 4.38 | 3.17 | 3.00 | 1.63 | 3.09 |
| <b>Mindfulness Meditation- Guided</b>                         | 1.80 | 4.38 | 3.17 | 2.80 | 1.38 | 3.04 |
| <b>Yoga Fitness Poses</b>                                     | 2.00 | 3.38 | 2.67 | 4.00 | 1.75 | 3.01 |
| <b>Be and it will be</b>                                      | 2.50 | 4.38 | 3.33 | 1.83 | 1.75 | 3.01 |
| <b>Psych Facts</b>                                            | 2.10 | 3.88 | 2.83 | 3.20 | 1.88 | 3.00 |
| <b>Stress Release Hypnosis</b>                                | 1.70 | 4.5  | 3.00 | 2.60 | 1.25 | 2.95 |
| <b>Mental Workout</b>                                         | 1.60 | 3.13 | 4.17 | 2.80 | 1.38 | 2.92 |
| <b>Animated Quick Reference GAD</b>                           | 1.90 | 3.75 | 3.33 | 2.48 | 1.25 | 2.87 |
| <b>20 Minute Deep Relaxing Sleep with Hypnosis</b>            | 1.90 | 3.63 | 2.83 | 2.98 | 1.25 | 2.84 |
| <b>The Guru With You</b>                                      | 2.20 | 3.25 | 3.00 | 2.83 | 1.25 | 2.82 |
| <b>Binaural Brain Game</b>                                    | 2.90 | 3.25 | 2.67 | 2.37 | 2.13 | 2.80 |
| <b>Aggression Test</b>                                        | 2.50 | 4.00 | 2.83 | 1.67 | 1.75 | 2.75 |
| <b>Won Diary</b>                                              | 2.30 | 2.75 | 2.83 | 2.90 | 1.38 | 2.70 |
| <b>7 Second Meditation- Daily mindfulness</b>                 | 1.60 | 4.38 | 2.00 | 2.70 | 1.38 | 2.67 |
| <b>Reaction Time by sleep-2-Peak</b>                          | 2.30 | 3.50 | 2.67 | 2.20 | 1.63 | 2.67 |
| <b>Divine Chants to overcome Fear, Anxiety and Depression</b> | 1.60 | 3.88 | 3.33 | 1.85 | 1.50 | 2.66 |
| <b>Art Helps Healing</b>                                      | 1.50 | 2.38 | 2.83 | 2.17 | 1.25 | 2.22 |
